# Supplementary material
Source: publisher figshare collection journal article supplement (https://future-science-group.figshare.com/articles/dataset/_/23684487)
Supplement: Supplementary file 1 [file 1]

**Table 1.** Patient’s laboratory tests during hospitalization.

|  | **Initial presentation at the ED** | **D1** | **D2** | **D3** | **D4** | **D5** | **D6** | **D7** | **D13** |
| --- | --- | --- | --- | --- | --- | --- | --- | --- | --- |
| **Hs-TnT (pg/ml)** | 13 | >10000 | >10000 | >10000 | >10000 | >10000 | >10000 | >10000 | 9156 |
| **CK-MB (IU/L)** | 28 | 735 | 103 | 63 | 43 | 37 | 49 | 40 | 42 |
| **CK (IU/L)** | 122 | 7289 | 2114 | 721 | 347 | 233 | 278 | 421 | 1351 |
| **ALT (IU/L)** | 23 | 151 | 94 | 67 | 61 | 57 | 60 | 57 | 56 |
| **AST (IU/L)** | 24 | 1097 | 474 | 206 | 115 | 80 | 79 | 75 | 104 |
| **CRP (mg/dl)** | 0 | 2 | 8.7 | 20.3 | 26.8 | 19 | 16.5 | 15.7 | 21.5 |
| **Creatinine (mg/dl)** | 0.9 | 1.2 | 1.5 | 1.9 | 2 | 1.9 | 1.9 | 1.9 | 2.5 |
| **Urea (mg/dl)** | 49 | 59 | 95 | 125 | 147 | 148 | 143 | 168 | 165 |
| **LDH (IU/L)** | 240 | 2520 | 1976 | 1610 | 1616 | 1268 | 1176 | 914 | 622 |
| **Glucose (mg/dl)** | 217 | 176 | 153 | 119 | 104 | 106 | 109 | 111 | 119 |
| **Uric acid (mg/dl)** |  | 6.4 |  |  |  |  |  |  |  |
| **WBC/μl** | 11720 | 12500 | 16980 | 19000 | 16800 | 15450 | 13300 | 11900 | 21000 |
| **HCT (%)** | 44.8 | 48.3 | 44 | 44.2 | 46.8 | 47.4 | 48.5 | 49.1 | 47.2 |
| **PLT/μl** | 245000 | 169000 | 146000 | 130000 | 150000 | 148000 | 168000 | 162000 | 234000 |
| **Fibrinogen (mg/dl)** | 245 | 360 | 428 |  | 827 |  | 843 |  |  |
| **INR** | 1.44 | 1.13 | 1.25 |  | 1.42 | 1.2 | 1.2 |  |  |

**ED: Emergency department; D: day of hospitalization; hs-TnT: High sensitivity Troponin T; CK: Creatine Kinase; WBC: White Blood Cells; HCT: Hematocrit; PLT: Platelet Count; INR: International normalized ratio**
